# Supplementary material
Source: PubMed Central journal article supplement (PMC4604386)
Supplement: AAC.01341-15_zac011154522so1.pdf [file AAC.01341-15_zac011154522so1.pdf]

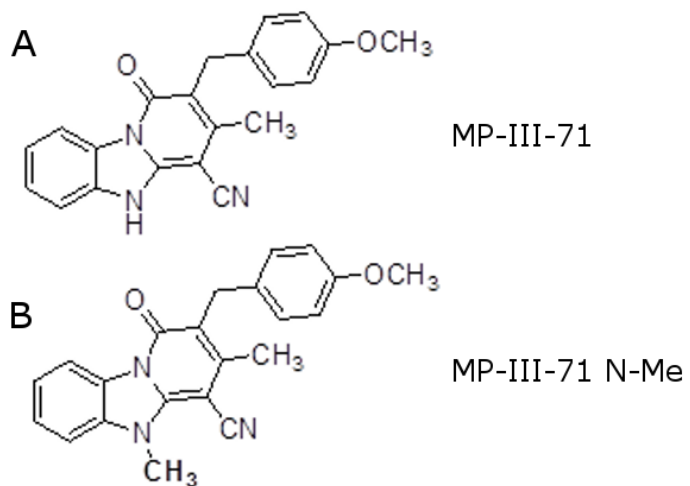

**Supplemental Figure S1. Novel compounds used in this study.** Chemical structure of (A) MP-III-71 and (B) N-Methyl derivative of MP-III-71.

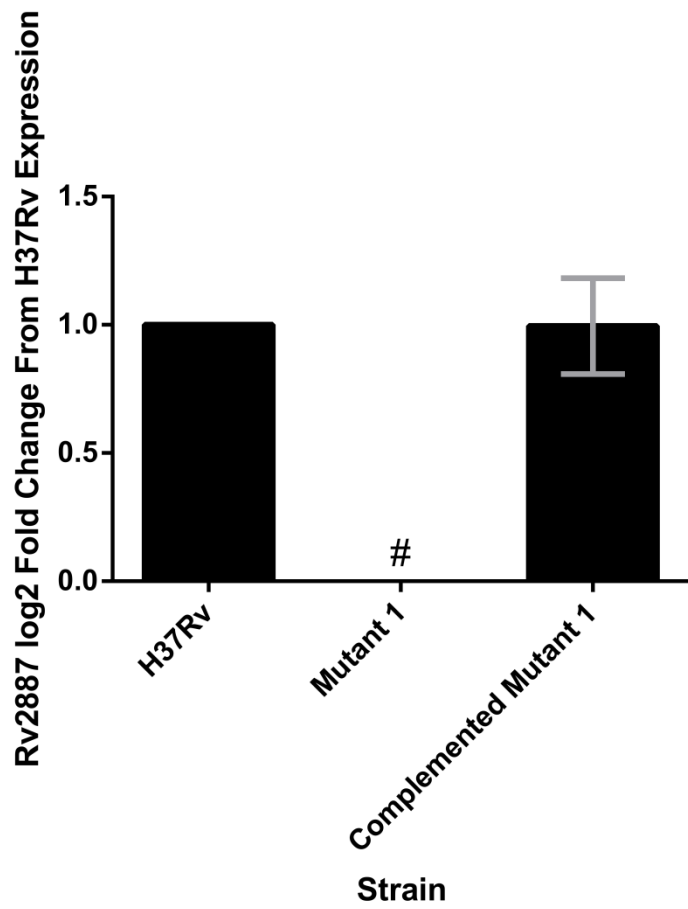

**Supplemental Figure S2. Expression of *Rv2887*.** Quantitative reverse transcription PCR of *Rv2887*, normalized to *sigA*. This shows *Rv2887* expression is abolished in mutant 1 but restored to wild-type levels in the complement.

| Whole Genome Sequencing |                                 |                         |                            |                        |                                 |                         |                |
|-------------------------|---------------------------------|-------------------------|----------------------------|------------------------|---------------------------------|-------------------------|----------------|
|                         | <u>Sample</u>                   | <u>Accession Number</u> | <u>Sequencing Platform</u> | <u>Number of reads</u> | <u>Average read length (bp)</u> | <u>Average coverage</u> | <u>Purpose</u> |
|                         | H37Rv                           | SRS889709               | Ion Torrent PGM            | 1118469                | 118                             | 23.90x                  | WGS            |
|                         | mutant 1                        | SRS891424               | Ion Torrent PGM            | 1128556                | 113                             | 20.30x                  | WGS            |
|                         | mutant 2                        | SRS891455               | Ion Torrent PGM            | 2085715                | 101                             | 33.90x                  | WGS            |
|                         | H37Rv                           | SRS891666               | SOLiD                      | 25731984               | 50                              | 266.14x                 | WGS            |
|                         | mutant 3                        | SRS893802               | SOLiD                      | 24748378               | 50                              | 264.32x                 | WGS            |
|                         |                                 |                         |                            |                        |                                 |                         |                |
| RNA-seq                 |                                 |                         |                            |                        |                                 |                         |                |
|                         | <u>Sample</u>                   | <u>Accession Number</u> | <u>Sequencing Platform</u> | <u>Number of reads</u> | <u>Average read length (bp)</u> |                         | <u>Purpose</u> |
| Replicate 1             | mutant 1 + MP-III-71            | SRS891491               | Ion Torrent PGM            | 962352                 | 119                             |                         | RNA-seq        |
|                         | mutant 1 + DMSO                 | SRS891670               | Ion Torrent PGM            | 999721                 | 120                             |                         | RNA-seq        |
|                         | mutant 1 complement + MP-III-71 | SRS891672               | Ion Torrent PGM            | 973824                 | 124                             |                         | RNA-seq        |
|                         | mutant 1 complement + DMSO      | SRS891793               | Ion Torrent PGM            | 929050                 | 130                             |                         | RNA-seq        |
| Replicate 2             | mutant 1 + MP-III-71            | SRS891794               | Ion Torrent PGM            | 2304483                | 85.5                            |                         | RNA-seq        |
|                         | mutant 1 + DMSO                 | SRS891795               | Ion Torrent PGM            | 1027257                | 99                              |                         | RNA-seq        |
|                         | mutant 1 complement + MP-III-71 | SRS891796               | Ion Torrent PGM            | 1657712                | 94                              |                         | RNA-seq        |
|                         | mutant 1 complement + DMSO      | SRS891857               | Ion Torrent PGM            | 1229293                | 199                             |                         | RNA-seq        |
| Replicate 3             | mutant 1 + MP-III-71            | SRS891859               | Ion Torrent PGM            | 899239                 | 89                              |                         | RNA-seq        |
|                         | mutant 1 + DMSO                 | SRS891860               | Ion Torrent PGM            | 1057459                | 120                             |                         | RNA-seq        |
|                         | mutant 1 complement + MP-III-71 | SRS891862               | Ion Torrent PGM            | 681799                 | 103                             |                         | RNA-seq        |
|                         | mutant 1 complement + DMSO      | SRS891863               | Ion Torrent PGM            | 1448013                | 101                             |                         | RNA-seq        |

**Supplemental Table S1. Next generation sequencing metrics.** Statistics from all sequencing runs. WGS = whole genome sequencing.

| <b>SNPs</b>                       |                        |                      |                            |                          |                                   |
|-----------------------------------|------------------------|----------------------|----------------------------|--------------------------|-----------------------------------|
| <u>Mutation Position in H37Rv</u> | <u>Reference Base</u>  | <u>Observed Base</u> | <u>Mutation Annotation</u> | <u>Mutation Effect</u>   | <u>Strain Containing Mutation</u> |
| 342542                            | A                      | G                    | Rv0282                     | D138G                    | mutant 1 and mutant 2             |
| 666418                            | G                      | A                    | Rv0573c                    | L275L                    | mutant 1 and mutant 2             |
| 2170598                           | C                      | T                    | Rv1918c                    | V5V                      | mutant 1 and mutant 2             |
| 2654064                           | A                      | G                    | Rv2374c                    | X344R                    | mutant 1 and mutant 2             |
| 3894771                           | A                      | G                    | Rv3478                     | T116A                    | mutant 1 and mutant 2             |
| 3894773                           | C                      | T                    | Rv3478                     | T116T                    | mutant 1 and mutant 2             |
| 4374865                           | C                      | A                    | Rv3892c                    | V273V                    | mutant 1 and mutant 2             |
| 2979619                           | A                      | G                    | Rv2658c                    | W24R                     | mutant 2                          |
| 4110523                           | C                      | T                    | Rv3668c                    | intergenic               | mutant 2                          |
| 3196612                           | T                      | C                    | Rv2887                     | V61A                     | mutant 3                          |
| <b>INDELS</b>                     |                        |                      |                            |                          |                                   |
| <u>Mutation Position in H37Rv</u> | <u>Reference Base</u>  | <u>Observed Base</u> | <u>Mutation Annotation</u> | <u>Mutation Location</u> | <u>Strain Containing Mutation</u> |
| 55533                             | TGCC                   | T                    | Rv0050                     | CDS                      | mutant 1 and mutant 2             |
| 131174                            | T                      | TG                   | Rv0108c                    | Intergenic               | mutant 1 and mutant 2             |
| 234496                            | C                      | CGT                  | Rv0197                     | CDS                      | mutant 1 and mutant 2             |
| 424320                            | T                      | TC                   | Rv0354c                    | CDS                      | mutant 1 and mutant 2             |
| 1274805                           | CG                     | C                    | Rv1146                     | Intergenic               | mutant 1                          |
| 1780586                           | C                      | CG                   | Rv1575                     | CDS                      | mutant 1                          |
| 3580636                           | CT                     | C                    | Rv3203                     | Intergenic               | mutant 1                          |
| 3590686                           | G                      | GC                   | Rv3213c                    | Intergenic               | mutant 1                          |
| 3635239                           | GC                     | G                    | Rv3255c                    | CDS                      | mutant 1                          |
| 3862472                           | GA                     | G                    | Rv3443c                    | Intergenic               | mutant 1                          |
| 4232224                           | AGGTGGAGACAG<br>TGGGCT | A                    | Rv3785                     | CDS                      | mutant 1                          |
| 3196829                           | GGA                    | G                    | Rv2887                     | intergenic               | mutant 2                          |

**Supplemental Table S2. SNPs and indels identified in whole genome sequencing not present in parent H37Rv strain.**

| <u>Strain</u> | <u>Gene Mutated</u> | <u>length of protein</u> | <u>transposon point of insertion</u> | <u>Reason tested</u>       | <u>MIC MP-III-71</u> |
|---------------|---------------------|--------------------------|--------------------------------------|----------------------------|----------------------|
| CDC1551       | NA                  |                          |                                      |                            | 0.125-0.25 ug/mL     |
| JHU2658c-26   | Rv2658c             | 369                      | 26                                   | Mutated in mutant sequence | 0.125 ug/mL          |
| JHU2658c-30   | Rv2658c             | 369                      | 30                                   | Mutated in mutant sequence | 0.125 ug/mL          |
| JHU3668c-441  | Rv3668c             | 699                      | 441                                  | Mutated in mutant sequence | 0.25-0.125 ug/mL     |
| JHU0559c-124  | Rv0559c             | 339                      | 124                                  | RNA-seq hit                | 0.25 ug/mL           |
| JHU0559c-202  | Rv0559c             | 339                      | 202                                  | RNA-seq hit                | 0.25 ug/mL           |
| JHU2463-1183  | Rv2463              | 1185                     | 1183                                 | RNA-seq hit                | 0.25 ug/mL           |

**Supplemental Table S3. MIC of MP-III-71 against select transposon mutants. MICs are given in  $\mu\text{g}/\text{mL}$ .**

| <b>A: MICs of <i>M. tuberculosis</i> strains (ug/mL)</b> |              |                 |                              |
|----------------------------------------------------------|--------------|-----------------|------------------------------|
| <u>Drug</u>                                              | <u>H37Rv</u> | <u>mutant 1</u> | <u>complemented mutant 1</u> |
| MP-III-71                                                | 0.125-0.5    | 1-2             | 0.125-0.5                    |
| Me-MP-III-71                                             | >32          | >32             | >32                          |
| Isoniazid                                                | 0.04         | 0.04            | 0.04                         |
| Rifampin                                                 | 0.125        | 0.125           | 0.125                        |
| Ethambutol                                               | 1-2          | 1-2             | 1-2                          |
| Kanamycin                                                | 2            | 2               | 2                            |
| Verapamil                                                | 200          | 200             | 200                          |
| Chlorpromazine                                           | 10           | 10              | 10                           |
| Salicylate                                               | 250-500      | 250-500         | 250-500                      |
| CCCP                                                     | 8            | 8               | 8                            |

| <b>B: Fold change in MIC compared with MP-III-71 alone (MIC of MP-III-71 + drug/MIC of MP-III-71 alone)</b> |              |                 |                              |
|-------------------------------------------------------------------------------------------------------------|--------------|-----------------|------------------------------|
| <u>Drug combination</u>                                                                                     | <u>H37Rv</u> | <u>mutant 1</u> | <u>complemented mutant 1</u> |
| MP-III-71 + 50 ug/mL Verapamil                                                                              | 0.125        | 0.5-1           | 0.125                        |
| MP-III-71 + 2.5 ug/mL Chlorpromazine                                                                        | 0.256        | 1               | 0.256                        |
| MP-III-71 + 62.5 ug/mL Salicylate                                                                           | 0.5-1        | 0.25-0.5        | 1                            |
| MP-III-71 + 1 ug/mL CCCP                                                                                    | 1-4          | 0.5-1           | 2-4                          |

**Supplemental Table S4. MIC of select compounds against H37Rv, mutant 1 and mutant 1 complement.**

MICs are given in  $\mu\text{g/mL}$  (A) or as fold change over MP-III-71 alone (B). CCCP=carbonyl cyanide 3-chlorophylhydrazone.

|                              | Hit (Subject ) | % identity | Alignment length | Number of mismatches | Number of gap starts | Query start | Query end | Subject Start | Subject end | Expect value | Bit score |
|------------------------------|----------------|------------|------------------|----------------------|----------------------|-------------|-----------|---------------|-------------|--------------|-----------|
| MarR (gi 13384163) as query  | Rv1404         | 34.67      | 75               | 49                   | 0                    | 37          | 111       | 42            | 116         | 4.00E-07     | 47.4      |
|                              | Rv0880         | 27.27      | 110              | 69                   | 2                    | 4           | 113       | 9             | 107         | 3.00E-05     | 41.2      |
|                              | Rv2887         | 25.38      | 130              | 96                   | 1                    | 13          | 142       | 8             | 136         | 2.00E-04     | 38.1      |
|                              | Rv0737         | 27.16      | 81               | 57                   | 1                    | 33          | 111       | 49            | 129         | 3.00E-04     | 37.7      |
|                              | Rv0042c        | 32.39      | 71               | 48                   | 0                    | 37          | 107       | 82            | 152         | 0.027        | 31.2      |
|                              | Rv2922c        | 33.33      | 45               | 30                   | 0                    | 97          | 141       | 723           | 767         | 2.4          | 24.6      |
|                              | Rv1442         | 33.33      | 24               | 16                   | 0                    | 72          | 95        | 49            | 72          | 3.9          | 24.3      |
|                              | Rv1663         | 28.57      | 35               | 25                   | 0                    | 103         | 137       | 322           | 356         | 4.6          | 23.9      |
| MarA (gi 190905560) as query | Rv1931c        | 30.49      | 82               | 55                   | 2                    | 28          | 108       | 175           | 255         | 4.00E-09     | 53.5      |
|                              | Rv3833         | 26.51      | 83               | 60                   | 1                    | 18          | 100       | 156           | 237         | 1.00E-05     | 42        |
|                              | Rv3736         | 28.92      | 83               | 56                   | 2                    | 27          | 108       | 246           | 326         | 0.017        | 31.6      |
|                              | Rv2463         | 44.83      | 29               | 12                   | 1                    | 42          | 70        | 168           | 192         | 0.23         | 27.7      |
|                              | Rv0543c        | 30.23      | 43               | 30                   | 0                    | 7           | 49        | 55            | 97          | 1.7          | 25        |
|                              | Rv0672         | 25.4       | 63               | 38                   | 4                    | 24          | 86        | 22            | 75          | 6.2          | 23.1      |

**Supplemental Table S5. Results of using BLAST to compare *E. coli* MarR and MarA to all H37Rv proteins.**
